# Supplementary material for: Metal specificity of the Ni(ii) and Zn(ii) binding sites of the N-terminal and G-domain of E. coli HypB
Source: Royal Society of Chemistry journal article supplement (doi:10.1039/d1dt02126e), 2021-01-01
Supplement: d1dt02126e1.pdf [file d1dt02126e1.pdf]

## Electronic Supplementary Information (ESI)

### Metal specificity of N-terminal and G-domain Ni(II) and Zn(II) binding sites in *E.coli* HypB

Aleksandra Hecel,<sup>a\*</sup> Arian Kola,<sup>b</sup> Daniela Valensin,<sup>b</sup> Henryk Kozlowski,<sup>a,c</sup> Magdalena Rowinska-Zyrek,<sup>a</sup>

<sup>a</sup> Faculty of Chemistry, University of Wrocław, F. Joliot-Curie 14, 50-383 Wrocław, Poland

<sup>b</sup> Department of Biotechnology, Chemistry and Pharmacy, University of Siena, Via A. Moro 2, 53100 Siena, Italy

<sup>c</sup> Institute of Health Sciences, University of Opole, 68 Katowicka St., 45-060 Opole, Poland

\*[aleksandra.hecel@chem.uni.wroc.pl](mailto:aleksandra.hecel@chem.uni.wroc.pl)

Table S1 Protonation constants of HypB(164-199) peptide in 40 mM SDS solution of 4 mM HClO<sub>4</sub> at I = 100 mM NaClO<sub>4</sub>. [L] = 0.5 mM, T = 298 K. The standard deviations are reported in parentheses as uncertainties on the last significant figure.

| species          | log $\beta$ | pKa    |
|------------------|-------------|--------|
| HL               | 9.85(2)     | 9.85 K |
| H <sub>2</sub> L | 17.86(4)    | 8.01 C |
| H <sub>3</sub> L | 24.31(5)    | 6.45 C |
| H <sub>4</sub> L | 30.15(5)    | 5.84 H |
| H <sub>5</sub> L | 35.51(5)    | 5.36 E |
| H <sub>6</sub> L | 40.38(7)    | 4.87 D |
| H <sub>7</sub> L | 43.35(9)    | 2.97 D |
| H <sub>8</sub> L | 46.03(8)    | 2.68 D |

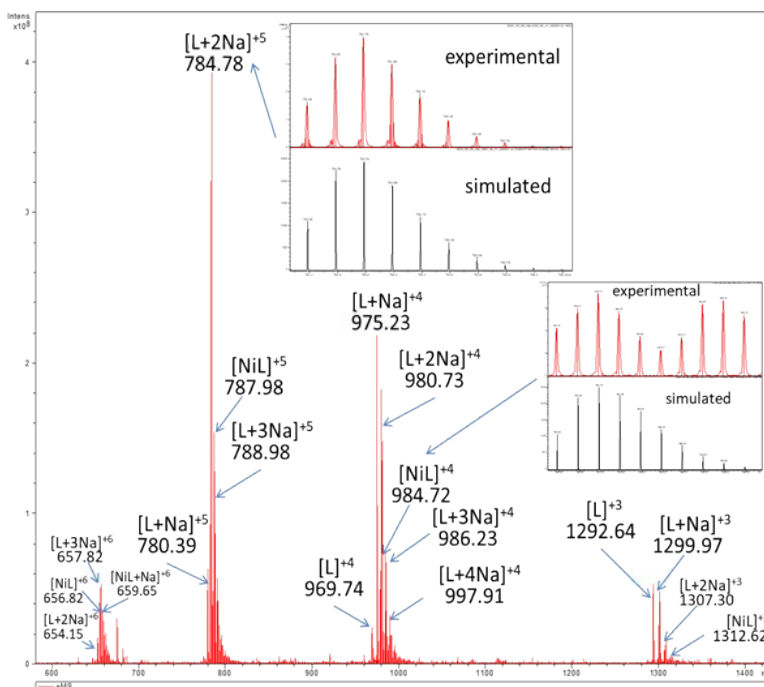

Figure S1. ESI-MS spectra of Ni(II)- HypB(164-199) system. Molar ratio for Ni(II) complexes 1:1. [L] = 0.5 mM. The complexes were prepared in a mixture of MeOH:H<sub>2</sub>O (1:1) at pH 7. For chosen ligand and complex a comparison of experimental and simulated signals were performed on ESI-MS spectra.

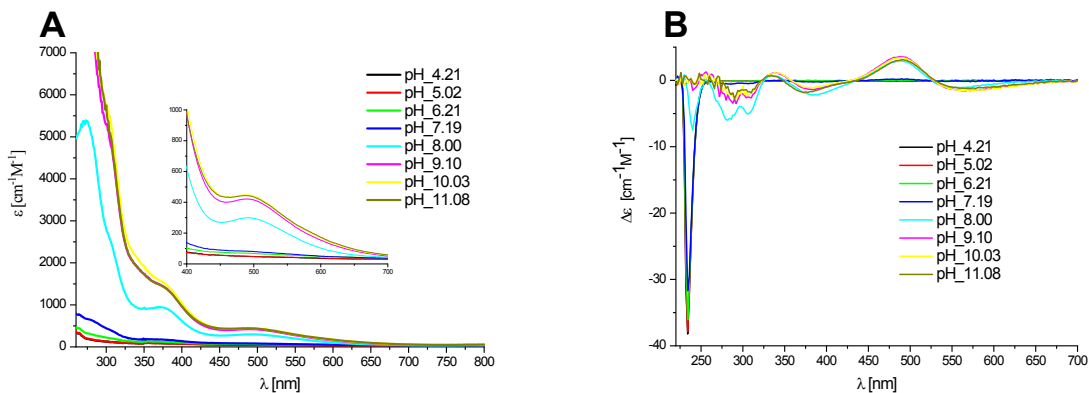

Figure S2. The absorption spectra (A) UV-Vis and (B) CD for the Ni(II)- HypB(164-199) system in 40 mM SDS solution of 4mM HClO<sub>4</sub> at I = 100 mM NaClO<sub>4</sub>. [L] = 0.5 mM, molar ratio M:L – 1:1. d-d bands in the UV-Vis spectra are enlarged. Optical path lengths of 1 cm.

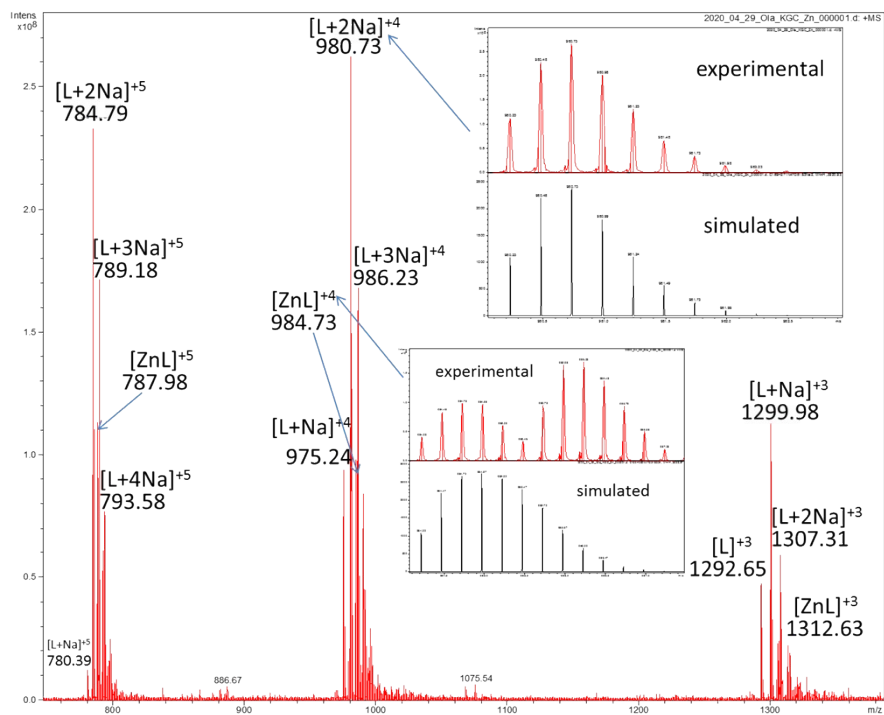

Figure S3. ESI-MS spectra of Zn(II)- HypB(164-199) system. Molar ratio for Zn(II) complexes 1:1. [L] = 0.5 mM. The complexes were prepared in a mixture of MeOH:H<sub>2</sub>O (1:1) at pH 7. For chosen ligand and complex a comparison of experimental and simulated signals were performed on ESI-MS spectra.

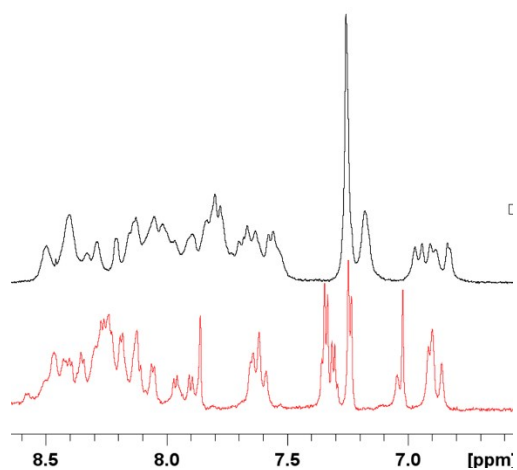

Figure S4. Comparison between amide regions of 1D  $^1\text{H}$  NMR spectra of HypB(93-128) fragment in aqueous solutions in presence (black lines) and in absence of 40 mM SDS (red lines).  $C_M = 0.5$  mM, pH = 8.0,  $T = 298$  K.

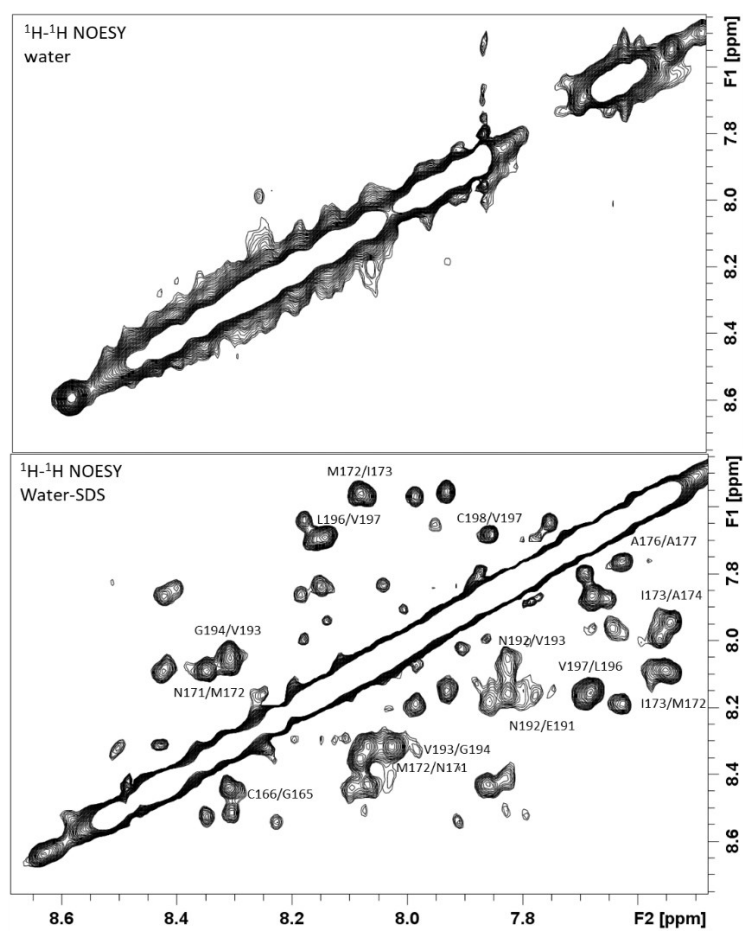

Figure S5. 2D NMR Spectra of  $^1\text{H}$ - $^1\text{H}$  NOESY spectra of HypB(164-199) at pH 7.8,  $T$  298 K in absence (top) and in presence (bottom) of 40 mM SDS.

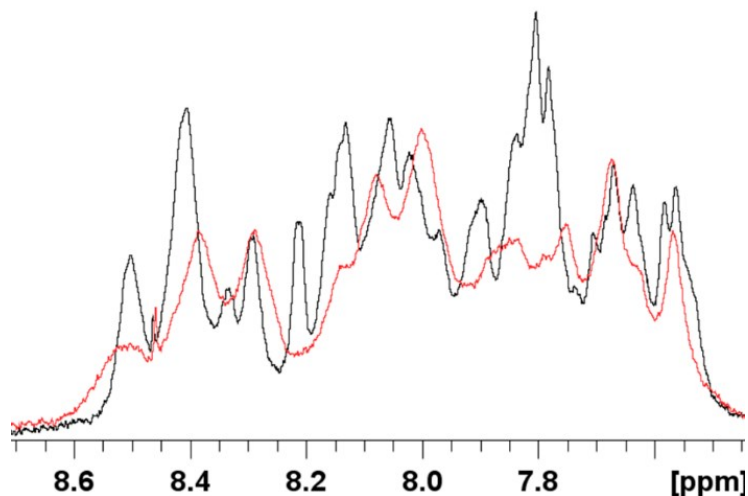

Figure S6. Comparison between amide regions of 1D  $^1\text{H}$  NMR spectra of HypB(164-199) fragment in aqueous solutions containing 40 mM SDS,  $C_M = 0.5$  mM,  $\text{pH} = 8.0$ ,  $T = 298$  K, in absence (black lines) and in presence of 1.0 Zn(II) eqs. (red lines).

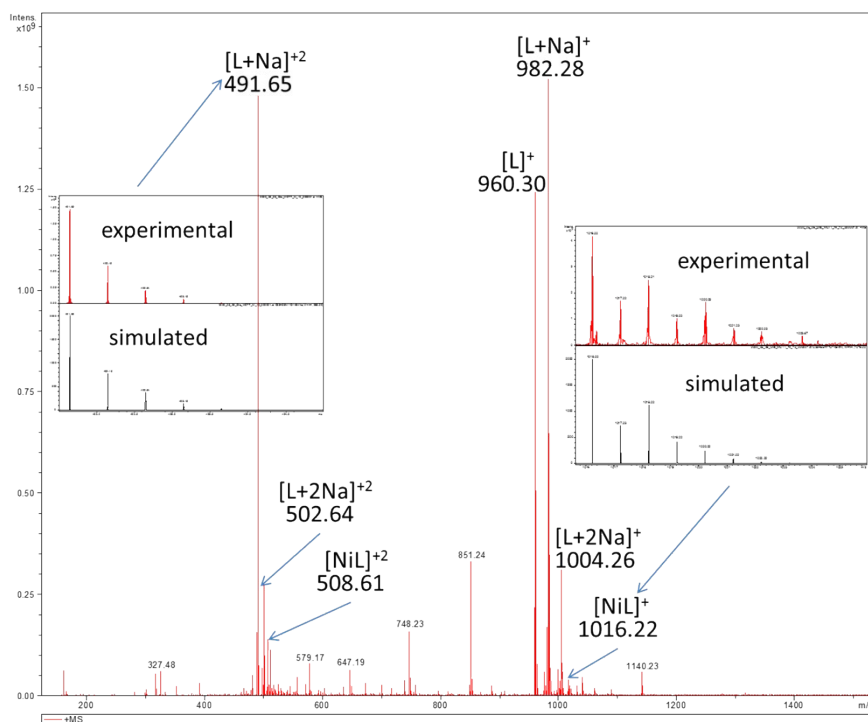

Figure S7. ESI-MS spectra of Ni(II)-HypB(1-10) system. Molar ratio for Ni(II) complexes 1:1.  $[\text{L}] = 0.5$  mM. The complexes were prepared in a mixture of MeOH:H<sub>2</sub>O (1:1) at pH 7. For chosen ligand and complex a comparison of experimental and simulated signals were performed on ESI-MS spectra.

Table S2 Protonation constants of HypB(1-10)peptide in A) H<sub>2</sub>O and B) 40 mM SDS solution of 4 mM HClO<sub>4</sub> at I = 100 mM NaClO<sub>4</sub>, [L] = 0.5 mM, T = 298 K. The standard deviations are reported in parentheses as uncertainties on the last significant figure.

| species                                                              | logβ     | pKa             |
|----------------------------------------------------------------------|----------|-----------------|
| <b>A) NH<sub>2</sub>-MCTTCGCGEG-NH<sub>2</sub> in H<sub>2</sub>O</b> |          |                 |
| HL                                                                   | 9.22(2)  | 9.22 N-terminus |
| H <sub>2</sub> L                                                     | 17.99(2) | 8.77 C          |
| H <sub>3</sub> L                                                     | 25.94(3) | 7.95 C          |
| H <sub>4</sub> L                                                     | 32.99(4) | 7.05 C          |
| H <sub>5</sub> L                                                     | 37.60(7) | 4.61 E          |
| <b>B) NH<sub>2</sub>-MCTTCGCGEG-NH<sub>2</sub> in SDS</b>            |          |                 |
| HL                                                                   | 9.04(2)  | 9.04 N-terminus |
| H <sub>2</sub> L                                                     | 17.25(2) | 8.21 C          |
| H <sub>3</sub> L                                                     | 24.71(4) | 7.46 C          |
| H <sub>4</sub> L                                                     | 30.02(6) | 5.31 C          |
| H <sub>5</sub> L                                                     | 33.36(8) | 3.34 E          |

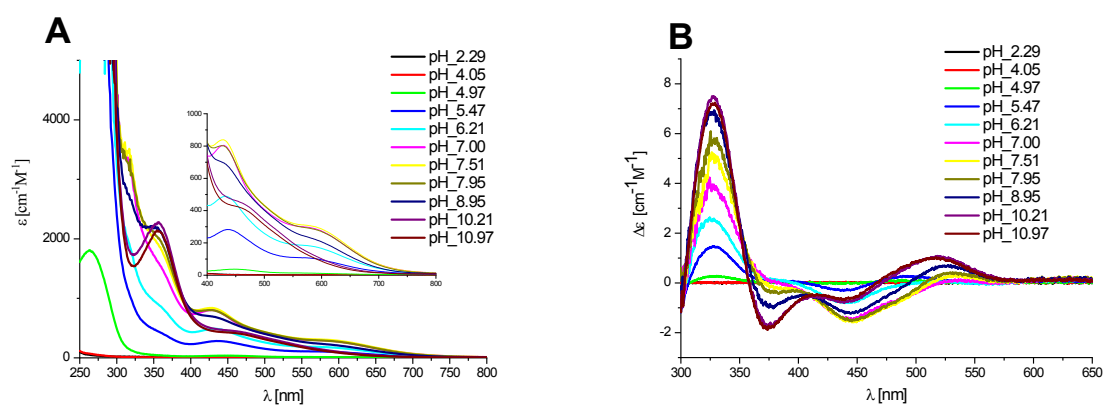

Figure S8. The absorption spectra (A) UV-Vis and (B) CD for the Ni(II)- HypB(1-10)system in H<sub>2</sub>O solution. [L] = 0.5 mM, molar ratio M:L – 1:1. d-d bands in the UV-Vis spectra are enlarged. Optical path lengths of 1 cm.

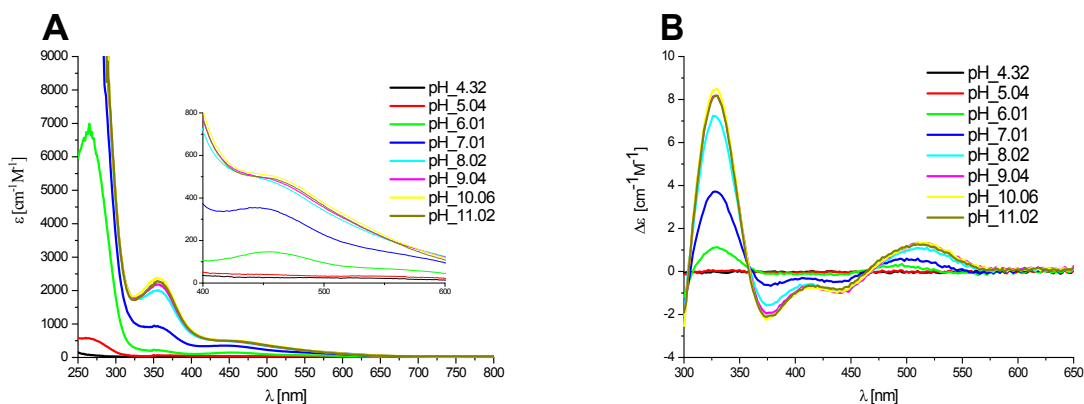

Figure S9. The absorption spectra (A) UV-Vis and (B) CD for the Ni(II)- HypB(1-10) system in 40 mM SDS solution.  $[L] = 0.5 \text{ mM}$ , molar ratio M:L – 1:1. d-d bands in the UV-Vis spectra are enlarged. Optical path lengths of 1 cm.

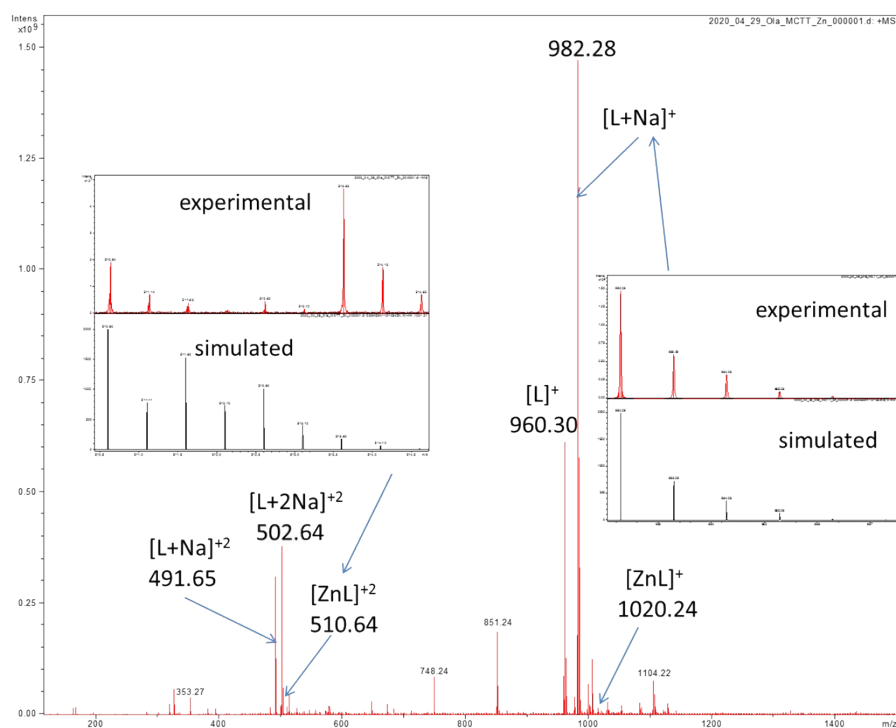

Figure S10. ESI-MS spectra of Zn(II)- HypB(1-10) system. Molar ratio for Ni(II) complexes 1:1.  $[L] = 0.5 \text{ mM}$ . The complexes were prepared in a mixture of MeOH:H<sub>2</sub>O (1:1) at pH 7. For chosen ligand and complex a comparison of experimental and simulated signals were performed on ESI-MS spectra.

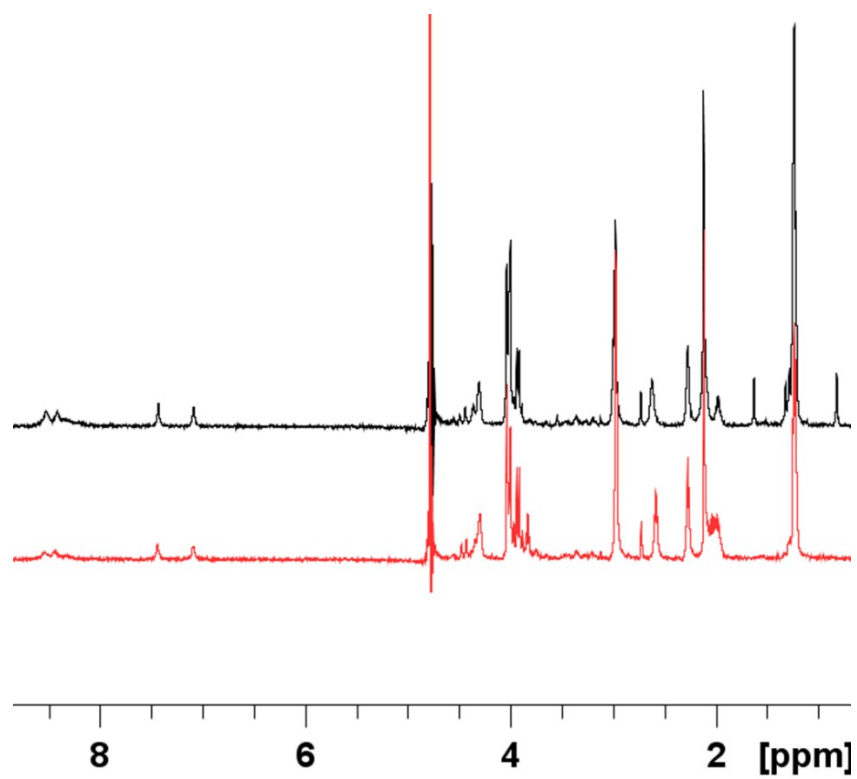

Figure S11. Comparison between amide regions of 1D  $^1\text{H}$  NMR spectra of HypB(1-10) fragment in aqueous solutions in presence (black lines) and in absence of SDS micelles (red lines).  $C_M = 0.5$  mM, pH = 8.0,  $T = 298$  K.

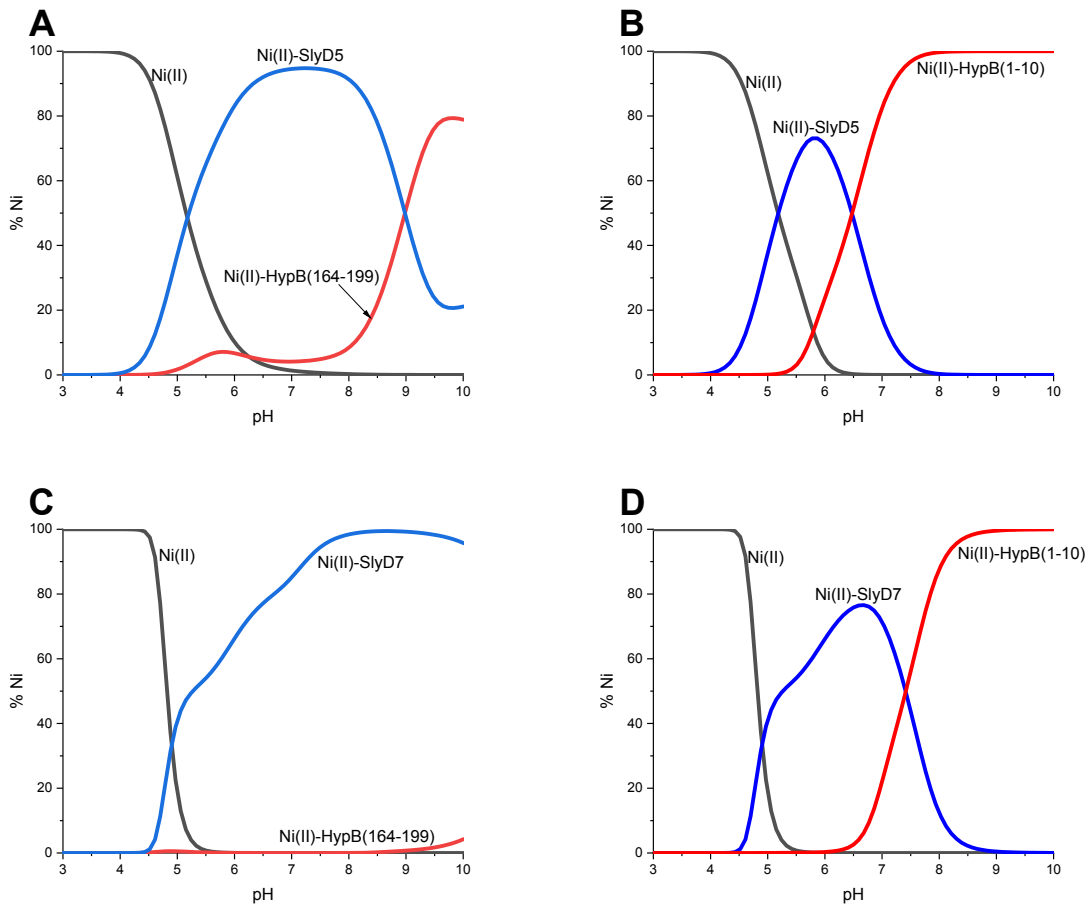

Figure S12. Competition plots for A) Ni(II)-HypB(164-199) and Ni(II)-SlyD5 (Ac-GHGHHDHGHEHG-NH<sub>2</sub>); B) Ni(II)-HypB(1-10) and Ni(II)-SlyD5 (Ac-GHGHHDHGHEHG-NH<sub>2</sub>); C) Ni(II)-HypB(164-199) and Ni(II)-SlyD7 (Ac-AHGHVHGAHDHHD-NH<sub>2</sub>) and D) Ni(II)-HypB(1-10) and Ni(II)-SlyD7 (Ac-AHGHVHGAHDH).
